# Supplementary material for: Precise AuxPt1−x Alloy Nanoparticle Array of Tunable Composition for Catalytic Applications
Source: PubMed Central journal article supplement (PMC4746634; doi:10.1038/srep20536), 2016-02-09
Supplement: srep20536-s1.pdf [file srep20536-s1.pdf]

## Supplementary Information

### Precise $\text{Au}_x\text{Pt}_{1-x}$ Alloy Nanoparticle Array of Tunable Composition for Catalytic Applications

*Sarah Jahn*<sup>†,‡</sup>, *Sebastian J. Lechner*<sup>†,‡,§</sup>, *Helene Freichels*<sup>§</sup>, *Martin Möller*<sup>§</sup>, and

*Joachim P. Spatz*<sup>†,‡\*</sup>

<sup>†</sup>Department of New Materials and Biosystems, Max Planck Institute for Intelligent Systems, Stuttgart, Germany

<sup>‡</sup>Department of Biophysical Chemistry, University of Heidelberg, Heidelberg, Germany

<sup>§</sup>DWI - Leibniz Institute for Interactive Materials, Aachen, Germany

## Results

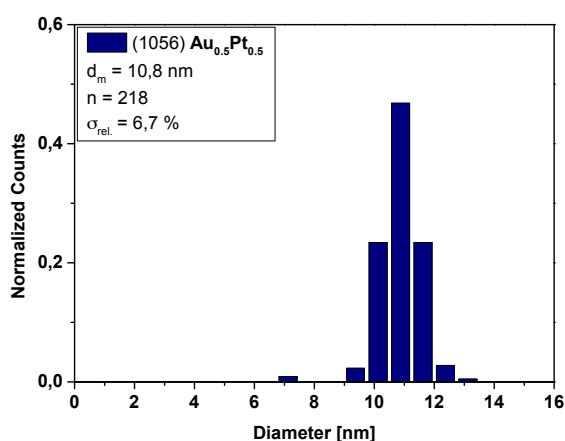

**Figure S1.** Size distribution of  $\text{Au}_{0.5}\text{Pt}_{0.5}$  NP (Polymer: PS(1056)-b-2VP(495)).

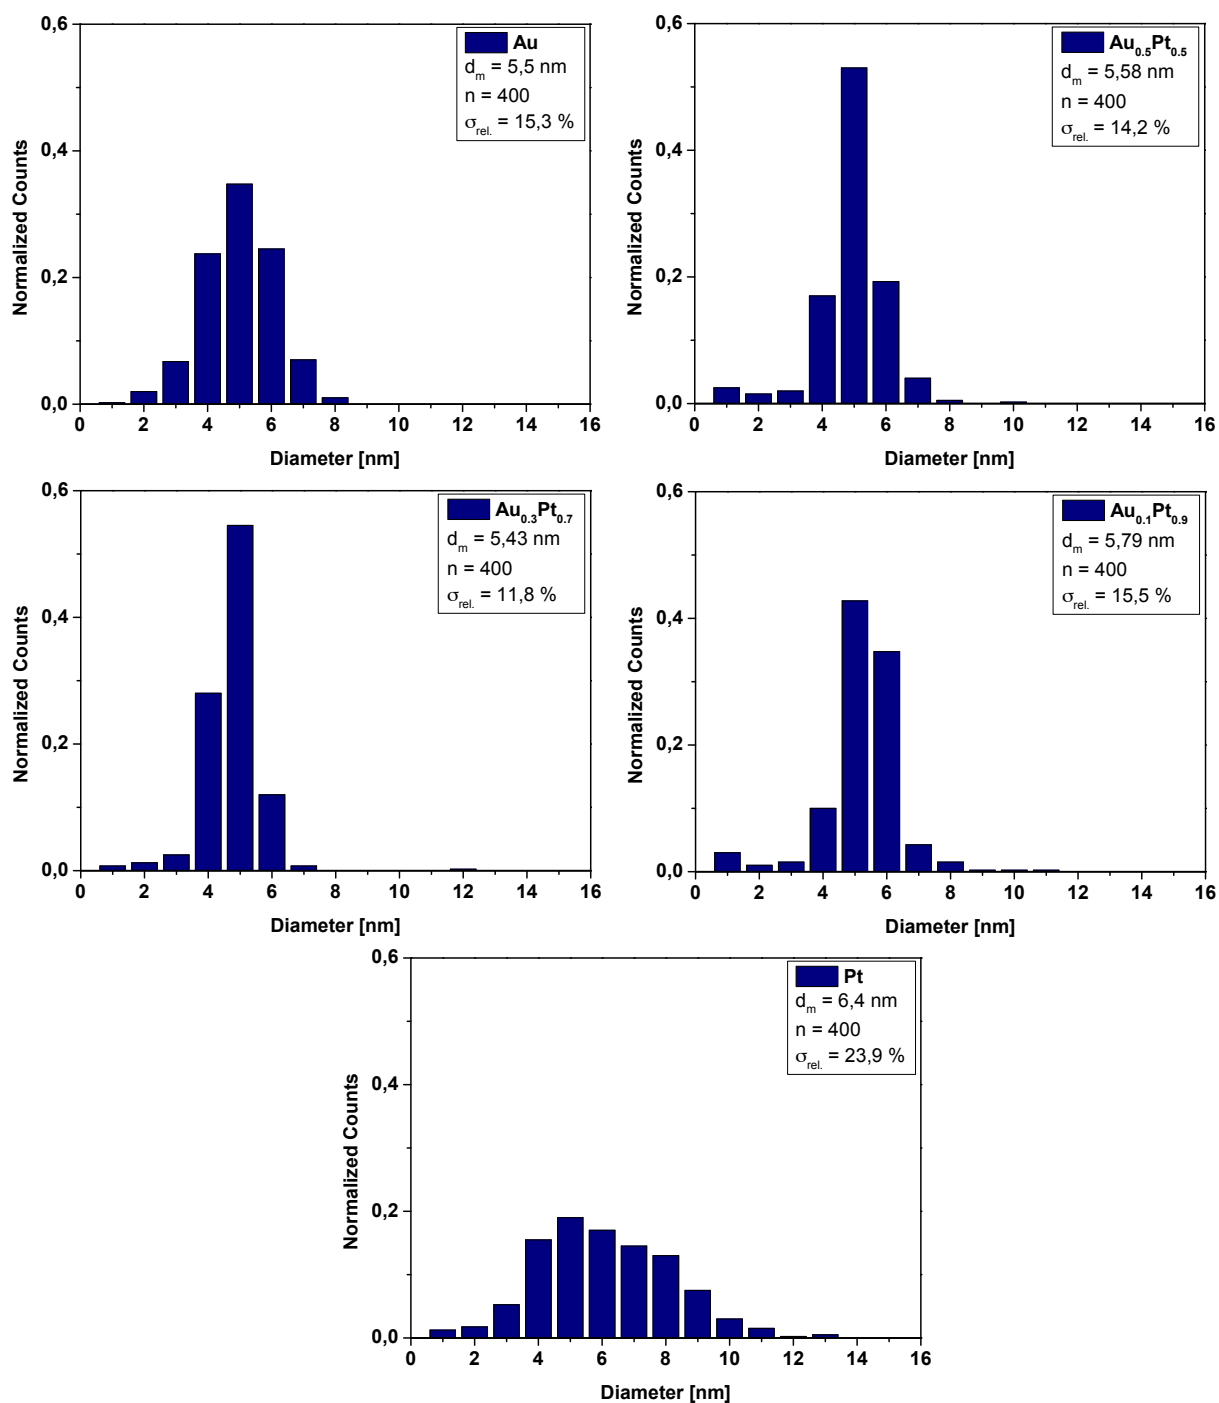

**Figure S2.** Size distribution of the  $Au_xPt_{1-x}$  NP used for catalytic measurements (Polymer: PS(227)-b-2VP(99)).
